# Supplementary material
Source: Springer Nature journal article supplement (https://www.springermedizin.de/resource/supplementary/12885_2005_514_MOESM1_ESM.pdf/9469660)

Number of apoptosis

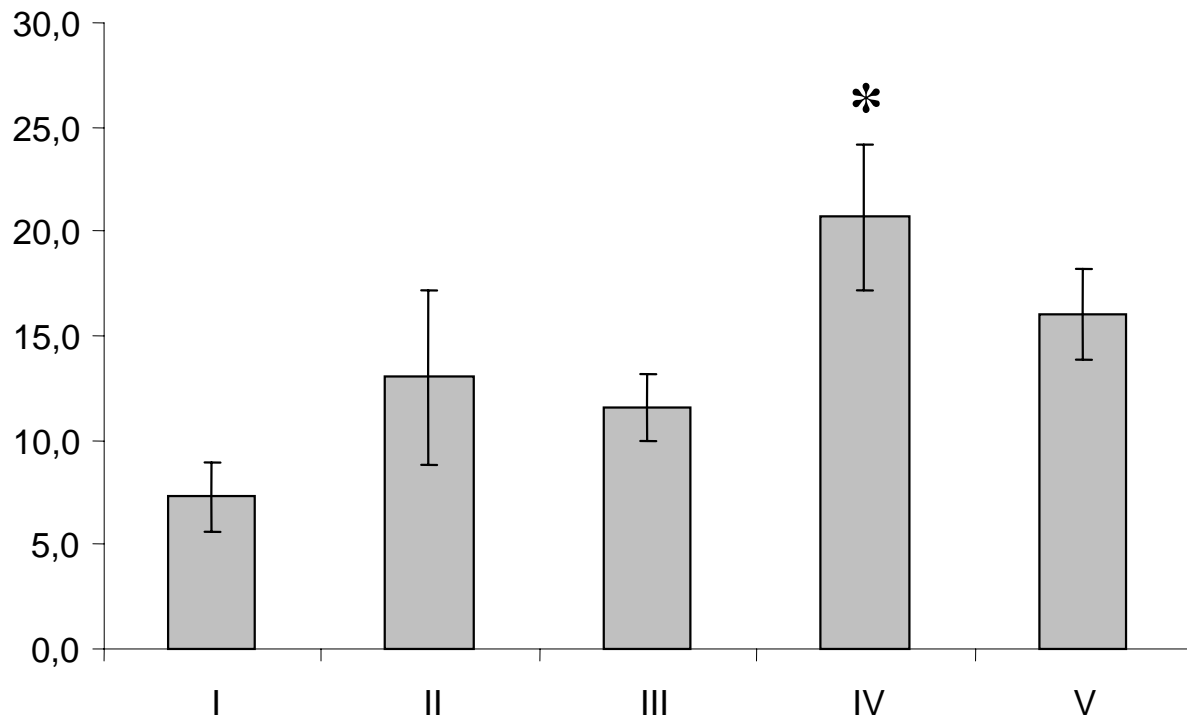

Supplement: MOESM1 [file 9469660]
